- tion of E-NTPDase1 (CD39) to renal protection from ischemia-reperfusion injury. *FASEB J* 2007; 21:2863-73
29. Lee HT, Xu H, Nasr SH, Schnermann J, Emala CW: A1 adenosine receptor knockout mice exhibit increased renal injury following ischemia and reperfusion. *Am J Physiol Renal Physiol* 2004; 286:F298-306
  30. Gallos G, Ruyle TD, Emala CW, Lee HT: A1 adenosine receptor knockout mice exhibit increased mortality, renal dysfunction, and hepatic injury in murine septic peritonitis. *Am J Physiol Renal Physiol* 2005; 289:F369-76
  31. Kim M, Chen SW, Park SW, D'Agati VD, Yang J, Lee HT: Kidney-specific reconstitution of the A1 adenosine receptor in A1 adenosine receptor knockout mice reduces renal ischemia-reperfusion injury. *Kidney Int* 2009; 75:809-23
  32. Park SW, Chen SW, Kim M, Brown KM, D'Agati VD, Lee HT: Protection against acute kidney injury *via* A(1) adenosine receptor-mediated Akt activation reduces liver injury after liver ischemia and reperfusion in mice. *J Pharmacol Exp Ther* 2010; 333:736-47
  33. Grenz A, Osswald H, Eckle T, Yang D, Zhang H, Tran ZV, Klingel K, Ravid K, Eltzschig HK: The reno-vascular A2B adenosine receptor protects the kidney from ischemia. *PLoS Med* 2008; 5:e137
  34. Bagshaw SM, Delaney A, Haase M, Ghali WA, Bellomo R: Loop diuretics in the management of acute renal failure: A systematic review and meta-analysis. *Crit Care Resusc* 2007; 9:60-8
  35. Bove T, Landoni G, Calabro MG, Aletti G, Marino G, Cerchierini E, Crescenzi G, Zangrillo A: Renoprotective action of fenoldopam in high-risk patients undergoing cardiac surgery: A prospective, double-blind, randomized clinical trial. *Circulation* 2005; 111:3230-5

## ANESTHESIOLOGY REFLECTIONS

### Liebig on the 100 Reichsmark Banknote

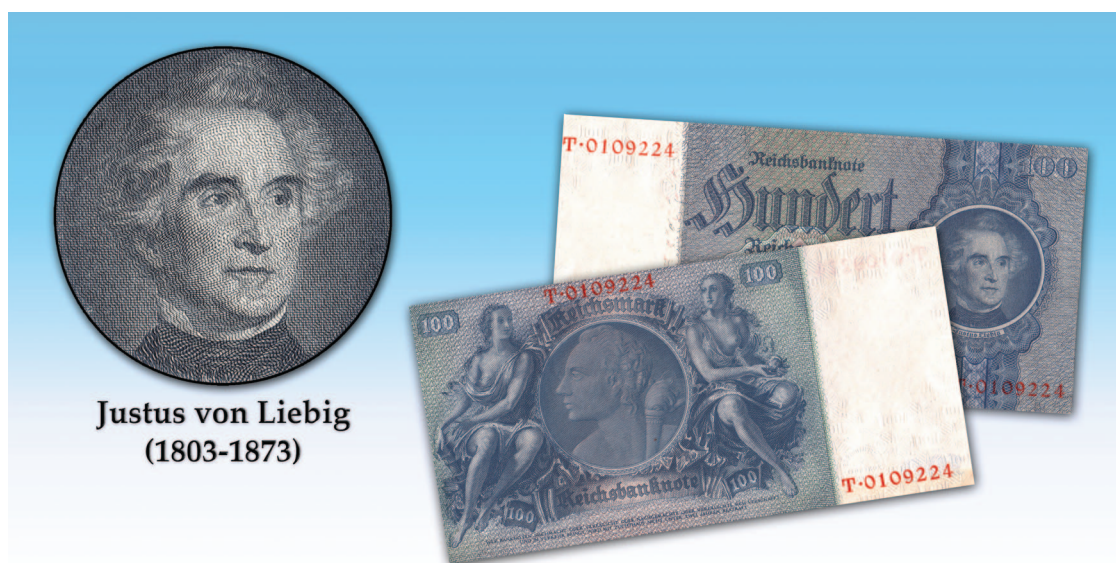

**Justus von Liebig  
(1803-1873)**

Naturalist Alexander von Humboldt steered Justus Liebig (1803–1873) from Gay-Lussac's private Parisian laboratory (1822–1824) to a chemistry professorship at Giessen in central Germany (1824–1852). There Liebig founded the world's first university-based research laboratory, unveiled chemical isomers, invented his "kali apparatus" (for combustion-based carbon analysis), theorized about chemical radicals, and edited the leading chemical journal. After pioneering nitrogen-based agricultural fertilizers in the late 1830s, Liebig published tomes on agricultural and physiological chemistry. As "*Freiherr* [Baron] von Liebig" by 1845 and "Munich Professor von Liebig" (1852–1873), he presided over the Bavarian Academy of Sciences and then mass produced nutritional meat extracts until his death. From 1935–1945, Liebig's portrait (*above left*) graced the obverse of the 100 Reichsmark banknote. The academic forefather of nearly all of today's professors of organic chemistry, Liebig is hailed by anesthesiologists as the third man to independently discover chloroform. (Copyright © the American Society of Anesthesiologists, Inc. This image also appears in the *Anesthesiology Reflections* online collection available at [www.anesthesiology.org](http://www.anesthesiology.org).)

George S. Bause, M.D., M.P.H., Honorary Curator, ASA's Wood Library-Museum of Anesthesiology, Park Ridge, Illinois, and Clinical Associate Professor, Case Western Reserve University, Cleveland, Ohio. [UJYC@aol.com](mailto:UJYC@aol.com).
